# Supplementary material for: Porphyrin dimers: A theoretical understanding of the impact of electronic coupling strength on the two-photon absorption properties
Source: Royal Society of Chemistry journal article supplement (doi:10.1039/b906337d), 2009-01-01
Supplement: b906337d.pdf [file b906337d.pdf]

## Supporting Information

# Porphyrin Dimers: A Theoretical Understanding of the Impact of Electronic Coupling Strength on the Two-Photon Absorption Properties

Shino Ohira and Jean-Luc Brédas

School of Chemistry and Biochemistry and Center for Organic Photonics and Electronics  
Georgia Institute of Technology  
Atlanta, Georgia 30332-0400

### Content:

Table S1. Lowest 4 OPA-active states with significant transition dipole moments in porphyrin dimers, computed at the INDO/CIS level.

Table S2. Lowest 4 OPA-active states with significant transition dipole moments in porphyrin dimers, computed at the INDO/MRDCI level.

Table S3. Lowest 2 TPA-active states with significant transition dipole moments in porphyrin dimers, computed at the INDO/MRDCI-SOS level.

**Table S1.** Lowest 4 OPA-active states with significant transition dipole moments in porphyrin dimers, computed at the INDO/CIS level.

|                | State 1 |                |      | State 2 |                |      | State 3 |                |      | State 4 |                |      |
|----------------|---------|----------------|------|---------|----------------|------|---------|----------------|------|---------|----------------|------|
|                | E / eV  | $\mu_{01}$ / D | f    | E / eV  | $\mu_{02}$ / D | f    | E / eV  | $\mu_{03}$ / D | f    | E / eV  | $\mu_{04}$ / D | f    |
| <b>1-0</b>     | 1.86    | 1.2            | 0.0  | 1.86    | 1.2            | 0.01 | 2.93    | 2.4            | 0.1  | 2.93    | 2.4            | 0.07 |
| <b>1-1</b>     | 1.71    | 6.8            | 0.30 | 2.65    | 19.5           | 3.82 | 3.17    | 9.7            | 1.13 | 3.35    | 11.1           | 1.57 |
| <b>1-2</b>     | 1.74    | 6.8            | 0.30 | 2.62    | 18.2           | 3.31 | 3.27    | 15.3           | 2.92 | 3.37    | 10.5           | 1.42 |
| <b>1-3</b>     | 1.76    | 6.5            | 0.29 | 2.54    | 14.5           | 2.02 | 3.12    | 19.0           | 4.25 | 3.29    | 16.9           | 3.56 |
| <b>1-4</b>     | 1.78    | 6.5            | 0.29 | 2.42    | 9.5            | 0.84 | 2.95    | 19.1           | 4.10 | 3.11    | 13.5           | 2.16 |
| <b>1-6</b>     | 1.79    | 6.8            | 0.31 | 2.18    | 4.3            | 0.15 | 2.61    | 4.1            | 0.16 | 2.87    | 20.0           | 4.35 |
| <b>1-2(0)</b>  | 1.74    | 6.8            | 0.30 | 2.62    | 18.2           | 3.31 | 3.27    | 15.3           | 2.92 | 3.37    | 10.5           | 1.42 |
| <b>1-2(30)</b> | 1.74    | 5.9            | 0.23 | 2.68    | 19.0           | 3.68 | 3.11    | 4.1            | 0.20 | 3.19    | 9.2            | 1.03 |
| <b>1-2(45)</b> | 1.77    | 5.7            | 0.22 | 2.66    | 16.1           | 2.61 | 3.12    | 17.1           | 3.45 | 3.24    | 7.4            | 0.68 |
| <b>1-2(60)</b> | 1.78    | 5.3            | 0.19 | 2.69    | 14.6           | 2.17 | 3.04    | 18.4           | 3.89 | 3.26    | 9.1            | 1.04 |
| <b>1-2(80)</b> | 1.80    | 4.5            | 0.14 | 2.92    | 23.4           | 6.10 | 3.31    | 13.4           | 2.28 | 3.32    | 13.4           | 2.27 |
| <b>1-2(90)</b> | 1.80    | 4.8            | 0.16 | 2.75    | 8.1            | 0.69 | 2.93    | 22.0           | 5.38 | 3.30    | 12.1           | 1.84 |
| <b>2</b>       | 1.81    | 6.0            | 0.25 | 2.51    | 19.0           | 3.45 | 3.13    | 3.3            | 0.13 | 3.19    | 4.5            | 0.24 |
| <b>3</b>       | 1.81    | 5.8            | 0.23 | 2.42    | 17.7           | 2.89 | 3.20    | 14.8           | 2.66 | 3.25    | 5.9            | 0.43 |
| <b>4</b>       | 1.38    | 8.1            | 0.34 | 2.51    | 21.3           | 4.34 | 2.73    | 5.1            | 0.27 | 2.92    | 5.0            | 0.27 |
| <b>5</b>       | 1.53    | 16.8           | 1.65 | 2.28    | 9.1            | 0.71 | 2.66    | 6.6            | 0.45 | 3.26    | 9.6            | 1.14 |
| <b>6</b>       | 1.49    | 16.8           | 1.59 | 2.25    | 8.5            | 0.62 | 2.60    | 6.7            | 0.44 | 3.20    | 7.8            | 0.74 |
| <b>7</b>       | 1.73    | 7.3            | 0.35 | 2.07    | 8.2            | 0.53 | 2.88    | 2.9            | 0.09 | 3.06    | 20.2           | 4.76 |

**Table S2.** Lowest 4 OPA-active states with significant transition dipole moments in porphyrin dimers, computed at the INDO/MRDCI level.

|                | State 1 |                |      | State 2 |                |      | State 3 |                |      | State 4 |                |      |
|----------------|---------|----------------|------|---------|----------------|------|---------|----------------|------|---------|----------------|------|
|                | E / eV  | $\mu_{01}$ / D | f    | E / eV  | $\mu_{02}$ / D | f    | E / eV  | $\mu_{03}$ / D | f    | E / eV  | $\mu_{04}$ / D | f    |
| <b>1-0</b>     | 2.24    | 1.8            | 0.03 | 2.30    | 1.4            | 0.02 | 3.10    | 1.6            | 0.03 | 3.12    | 1.0            | 0.01 |
| <b>1-1</b>     | 2.07    | 9.0            | 0.64 | 3.00    | 13.6           | 2.12 | 3.27    | 3.7            | 0.17 | 3.49    | 5.6            | 0.41 |
| <b>1-2</b>     | 2.10    | 9.3            | 0.69 | 2.98    | 14.5           | 2.37 | 3.39    | 2.1            | 0.06 | 3.59    | 2.6            | 0.09 |
| <b>1-3</b>     | 2.12    | 8.8            | 0.63 | 2.96    | 14.7           | 2.43 | 3.45    | 3.1            | 0.13 | 3.60    | 2.7            | 0.10 |
| <b>1-4</b>     | 2.15    | 9.1            | 0.68 | 2.93    | 13.4           | 1.99 | 3.42    | 6.8            | 0.60 | 3.52    | 4.7            | 0.30 |
| <b>1-6</b>     | 2.17    | 9.7            | 0.77 | 2.91    | 8.8            | 0.86 | 3.23    | 5.8            | 0.41 | 3.37    | 14.2           | 2.57 |
| <b>1-2(0)</b>  | 2.10    | 9.3            | 0.69 | 2.98    | 14.5           | 2.37 | 3.39    | 2.1            | 0.06 | 3.59    | 2.6            | 0.09 |
| <b>1-2(30)</b> | 2.12    | 8.9            | 0.64 | 2.99    | 13.6           | 2.10 | 3.43    | 3.0            | 0.12 | 3.43    | 2.3            | 0.07 |
| <b>1-2(45)</b> | 2.14    | 8.0            | 0.52 | 2.99    | 12.4           | 1.76 | 3.27    | 2.3            | 0.07 | 3.51    | 3.4            | 0.16 |
| <b>1-2(60)</b> | 2.18    | 7.5            | 0.46 | 3.01    | 11.2           | 1.43 | 3.40    | 3.5            | 0.16 | 3.50    | 3.9            | 0.20 |
| <b>1-2(80)</b> | 2.24    | 7.5            | 0.48 | 3.06    | 4.9            | 0.28 | 3.32    | 2.2            | 0.06 | 3.47    | 18.3           | 4.40 |
| <b>1-2(90)</b> | 2.24    | 7.0            | 0.42 | 3.09    | 3.1            | 0.11 | 3.33    | 3.1            | 0.12 | 3.46    | 17.1           | 3.82 |
| <b>2</b>       | 2.16    | 9.1            | 0.68 | 2.89    | 15.2           | 2.53 | 3.40    | 4.1            | 0.22 | 3.49    | 6.8            | 0.61 |
| <b>3</b>       | 2.19    | 8.7            | 0.63 | 2.80    | 14.8           | 2.31 | 3.14    | 3.4            | 0.14 | 3.43    | 3.3            | 0.14 |
| <b>4</b>       | 1.57    | 8.2            | 0.40 | 2.56    | 2.4            | 0.05 | 2.74    | 14.2           | 2.09 | 3.15    | 2.4            | 0.07 |
| <b>5</b>       | 1.07    | 15.2           | 0.94 | 2.10    | 4.8            | 0.18 | 2.34    | 4.3            | 0.17 | 2.84    | 6.1            | 0.40 |
| <b>6</b>       | 1.03    | 15.3           | 0.91 | 2.06    | 5.1            | 0.20 | 2.31    | 3.7            | 0.12 | 2.78    | 5.4            | 0.31 |
| <b>7</b>       | 2.01    | 10             | 0.76 | 2.33    | 7.2            | 0.46 | 3.10    | 4.4            | 0.23 | 3.36    | 21             | 5.63 |

**Table S3.** Lowest 2 TPA-active states with significant transition dipole moments in porphyrin dimers, computed at the INDO/MRDCI-SOS level.

|                | State 5 |                |                |                |                |               | State 6 |                |                |                |                |                        |
|----------------|---------|----------------|----------------|----------------|----------------|---------------|---------|----------------|----------------|----------------|----------------|------------------------|
|                | E / eV  | $\mu_{15}$ / D | $\mu_{25}$ / D | $\mu_{35}$ / D | $\mu_{45}$ / D | $\delta$ / GM | E / eV  | $\mu_{16}$ / D | $\mu_{26}$ / D | $\mu_{36}$ / D | $\mu_{46}$ / D | $\delta$ / GM          |
| <b>1-0</b>     | 3.55    | 2.2            | 0.0            | 2.6            | 0.7            | 5.3E+01       |         |                |                | N/A            |                |                        |
| <b>1-1</b>     | 2.39    | 2.3            | 1.7            | 0.7            | 2.3            | 2.0E+01       | 2.89    | 12.5           | 11.3           | 1.4            | 0.3            | 2.0E+03                |
| <b>1-2</b>     | 2.32    | 3.6            | 3.6            | 0.2            | 0.8            | 2.1E+01       | 2.99    | 14.7           | 17.2           | 1.2            | 0.2            | 2.0E+03                |
| <b>1-3</b>     | 2.28    | 3.1            | 3.5            | 3.3            | 1.5            | 4.5E+01       | 3.07    | 12.6           | 19.3           | 3.4            | 1.7            | 3.7E+03                |
| <b>1-4</b>     | 2.26    | 3.8            | 3.8            | 5.9            | 0.4            | 6.0E+01       | 3.21    | 14.9           | 19.9           | 12.6           | 0.7            | 7.1E+03                |
| <b>1-6</b>     | 2.24    | 2.5            | 1.9            | 5.5            | 0.6            | 2.4E+01       | 3.41    | 12.8           | 19.3           | 12.3           | 6.1            | 1.1E+04                |
| <b>1-2(0)</b>  | 2.32    | 3.6            | 3.6            | 0.2            | 0.8            | 2.1E+01       | 2.99    | 14.7           | 17.2           | 1.2            | 0.2            | 2.0E+03                |
| <b>1-2(30)</b> | 2.32    | 3.3            | 3.4            | 2.9            | 1.7            | 2.1E+01       | 3.01    | 14.6           | 19.6           | 1.5            | 1.9            | 2.2E+03                |
| <b>1-2(45)</b> | 2.31    | 2.5            | 3.1            | 0.9            | 2.3            | 1.5E+01       | 3.03    | 13.3           | 23.6           | 3.0            | 2.2            | 2.0E+03                |
| <b>1-2(60)</b> | 2.31    | 2.2            | 2.9            | 1.0            | 2.2            | 7.1E+00       | 3.07    | 11.9           | 26.8           | 5.7            | 4.7            | 7.0E+02                |
| <b>1-2(80)</b> | 2.33    | 0.9            | 1.0            | 2.8            | 0.5            | 1.1E+00       | 3.09    | 6.9            | 35.9           | 4.2            | 9.6            | 3.0E+02                |
| <b>1-2(90)</b> | 2.33    | 0.8            | 0.6            | 2.1            | 0.9            | 1.0E+00       | 3.14    | 4.0            | 38.1           | 3.8            | 6.3            | 7.3E+01                |
| <b>2</b>       | 2.31    | 4.7            | 4.1            | 2.1            | 1.2            | 9.2E+01       | 3.09    | 15.2           | 16.6           | 5.3            | 1.2            | 4.9E+03                |
| <b>3</b>       | 2.29    | 3.1            | 3.5            | 5.6            | 0.2            | 4.1E+01       | 3.011   | 14.8           | 20.2           | 7.3            | 2.8            | 4.3E+03                |
| <b>4</b>       | 2.48    | 3.5            | 0.5            | 0.0            | 0.0            | 1.6E+02       | 2.89    | 2.6            | 1.2            | 6.0            | 5.1            | 3.8E+02                |
| <b>5</b>       | 2.10    |                |                |                |                |               |         |                |                |                |                | 6.4E+04 <sup>(a)</sup> |
| <b>6</b>       | 2.06    |                |                |                |                |               |         |                |                |                |                | 1.4E+04 <sup>(a)</sup> |
| <b>7</b>       | 2.58    | 17.3           | 16.7           | 19.4           | 2.4            | 3.6E+03       | 3.40    | 7.3            | 4.4            | 1.0            | 3.9            | 5.0E+03                |

<sup>(a)</sup>TPA is mainly due to double resonance effects.
